# Supplementary material for: The expression of mimecan in adrenal tissue plays a role in an organism’s responses to stress
Source: publisher site journal article supplement (doi:10.18632/aging.202991), 2021-05-10
Supplement: Supplementary file [file aging-v13i9-202991-supplementary-material-SD2.pdf]

## SUPPLEMENTARY TABLE

**Supplementary Table 1. Primer sequences used in quantitative real-time PCR.**

| <b>Gene</b>    | <b>Forward primer</b>     | <b>Reverse primer</b>    |
|----------------|---------------------------|--------------------------|
| $\beta$ -actin | CCTGCTTCAGACCTCCATAGATG   | GCGAGAGGTCGAGTTTGCAA     |
| cyp11a1        | GTCCATCAGCAGTGTTATATTTGGG | GGAACATCTGGTAGACAGCATTGA |
| cyp11b1        | GCAGGGCCAAGAAAACCTA       | TTCCCTACACTGTGCCTGA      |
| cyp21          | AGCTGAAGCAGCACAAGGA       | TCGTCTTTGCCATCCCTTT      |
| mimecan        | AAAGATGAGGCAATAACACC      | TCCAAGTAGAGGAAGGTGAG     |
| StAR           | AAGGTGTTTCGCTTGGAGGTG     | AGACTTGCAGGCTTCCTGTGAG   |
